# Supplementary material for: Extensive ICP-MS and HPLC-QQQ detections reveal the content characteristics of main metallic elements and polyphenols in the representative commercial tea on the market
Source: Front Nutr. 2024 Aug 12;11:1450348. doi: 10.3389/fnut.2024.1450348 (PMC11345263; doi:10.3389/fnut.2024.1450348)
Supplement: Supplementary file 2 [file Table_1.xls]

## Sheet: Sheet6
Table S1 Compounds Content Index (CI) of 122 Tea Tree Samples
Name	Province	Type	3-O-GQA	3"-O-Me-EGCG	4-CQA	4"-O-Me-ECG	4-p-CoQA	5-CQA	5-p-CoQA	A-6-C-glc-8-C-ara	βG	C	Caffeine	CAH	C-C-C	C-CG	C-GCG	DGG	EACG	EC	ECG	EGC	EGCG	GA	GC	GC-C	GCG	GC-GC	GCG-GC	GC-glc	Isovitexin	K	K-3-O-gal	K-3-O-gal-rha-glc	K-3-0-glc	K-3-O-glc-rha-glc	L-theanine	M	M-3-O-gal	M-3-O-gal-rha-glc	M-3-O-glc	M-3-O-glc-gal	M-3-O-glc-rha-glc	Me-GQA	Proanthocyanidin B1	Proanthocyanidin B2	Proanthocyanidin B3	Proanthocyanidin B4	Q
			3-O-galloylquinic acid	Epigallocatechin-3-O-(3-O-methyl) gallate	4-caffeoylquinic acid	4"-O-Me-ECG	4-p-coumaroylquinic acid,	Chlorogenic acid	5-p-coumaroylquinic acid	Apigenin-6-C-glucosyl-8-C-arabinoside	β-glucogallina	Catechin	Caffeine	Caffeicacid hexoside	C-C-C	C-CG	C-GCG	Digalloyl glucose	Epiafzelechin gallate	Epicatechin	Epicatechin gallate	Epigallocatechin	Epigallocatechin gallate	Gallic acid	Gallocatechin	GC-C	Gallocatechin gallate	GC-GC	GCG-GC	Gallocatechin-glucoside	Isovitexin	Kaempferol	K-3-O-gal	Kaempferol-3-O-galactosylrutinoside	K-3-0-glc	Kaempferol-3-O-glucosylrutinoside	L-theanine	Myricetin	Myricetin-3-O-galactoside	Myricetin-3-O-galactosylrutinoside	Myricetin-3-O-glucoside	Myricetin-3-O-rutinoside	Myricetin-3-O-glucosylrutinoside	Methoxygalloylquinic acid	Proanthocyanidin B1	Proanthocyanidin B2	Proanthocyanidin B3	Proanthocyanidin B4	Quercetin
			CAS: 99745-62-7	CAS:83104-87-4	CAS:905-99-7	CAS:108907-44-4	CAS:93451-44-6	CAS:327-97-9	CAS:32451-86-8	PubChem CID:137333732	CAS:13405-60-2	CAS: 88191-48-4	CAS:58-08-2	CAS:331-39-5	doi: 10.1016/j.foodchem.2019.125507	doi: 10.1016/j.foodchem.2019.125507	doi: 10.1016/j.foodchem.2019.125507	PubChem CID:129628549	CAS:108907-43-3	CAS:490-46-0	CAS:1257-08-5	CAS:970-74-1	CAS:989-51-5	CAS:149-91-7	CAS:1617-55-6	doi: 10.1016/j.foodchem.2019.125507	CAS:4233-96-9	doi: 10.1016/j.foodchem.2019.125507	doi: 10.1016/j.foodchem.2019.125507	doi:10.1371/journal.pone.0062315	CAS:38953-85-4	CAS:520-18-3	CAS:23627-87-4	CAS:17650-84-9	CAS:480-10-4	doi:10.1016/j.foodchem.2019.125507	CAS:3081-61-6	CAS:529-44-2	CAS:15648-86-9	doi:10.1021/acs.jafc.5b01588	CAS:19833-12-6	CAS: 41093-68-9	CAS:19833-12-6	doi:10.1021/acs.jafc.5b01588	CAS:20315-25-7	CAS:29106-49-8	CAS:23567-23-9	CAS:29106-51-2	CAS:849061-97-8
Tongbaihong	Henan	Black tea	6.15	2.5	4.3	3.28	5.61	4.97	4.6	5.64	5.49	4.76	7.61	6.41	3.19	4.1	3.77	5.26	4.74	5.37	7.16	5.14	6.33	7.03	4.15	4.68	3.78	3.75	3.87	3.91	4.42	6.38	4.91	5.53	6.69	6.63	5.11	4.47	5.37	3	5.79	4.59	4.03	4.45	4.35	3.57	5.11	4.46	4.38
Xiushuininghong	Jiangxi	Black tea	6.06	2.64	4.16	3.32	5.57	4.81	4.59	5.87	5.29	4.42	7.58	6.59	2.82	3.79	3.52	5.19	4.75	5.25	7.04	5.13	6.31	7.06	4.09	4.92	3.61	3.55	3.66	3.85	4.73	6.47	5.15	5.62	6.92	6.74	4.91	4.34	5.38	2.88	5.79	4.48	3.98	4.35	3.93	3.36	4.83	4.19	4.54
Chuanhonggongfu	Sichuan	Black tea	5.95	3.03	3.93	3.97	5.46	4.59	4.57	5.9	5.18	4.42	7.62	6.43	2.82	3.72	3.44	5.01	4.67	5.09	6.86	5.03	6.07	7.06	4.13	5.18	3.55	3.62	3.55	3.48	4.87	6.46	5.06	5.8	6.67	6.65	5.43	4.21	5.08	2.84	5.48	4.24	3.79	4.26	4.08	3.52	4.84	4.26	4.44
Riyuetanhongcha	Taiwan	Black tea	6.34	3.86	3.88	4.79	5.42	5.15	4.37	5.33	6.02	4.83	7.63	6.49	3.8	3.75	3.22	5.8	5.66	5.26	7.18	5.26	6.66	7.24	4.25	4.16	4.11	4.15	3.74	3.67	3.87	6.4	5.21	6.2	5.69	6.27	5.32	5.29	5.56	2.37	5.24	4.3	4.21	4.73	4.76	3.73	5.56	4.59	4.05
Dajinya	Yunnan	Black tea	6.47	2.89	5.25	3.7	5.3	5.04	3.84	4.25	5.81	5.98	7.67	4.31	3.81	4.72	4.44	6.06	5.71	6.36	7.58	6.36	7.07	7.25	5.66	3.28	3.85	3.91	4.72	4.24	3.22	5.92	4.86	3.41	5.53	4.07	5.78	5.41	5.68	2	5.4	4.21	1.75	4.88	5.82	4.61	6.43	5.56	4.06
Jinsicha	Yunnan	Black tea	6.25	2.33	4.73	3.21	5.3	4.58	4.04	4.4	5.71	5.09	7.63	4.07	3.38	4	3.13	5.41	5.28	5.47	7.16	5.04	6.11	6.98	4.08	3.71	3.63	3.45	3.35	3.55	3.06	5.95	4.67	3.86	5.44	4.13	5.79	4.42	4.65	1.51	4.62	3.69	2.08	4.57	4.92	3.69	5.4	4.5	3.99
Qimenhongcha	Anhui	Black tea	6.24	3.45	5.17	3.39	4.38	5.13	5.42	5.53	6.28	5.41	8.09	6.05	3.39	4.21	3.62	5.91	5.37	5.36	7.26	5.01	6.51	7.14	4.09	4.02	4.04	3.98	3.97	4.32	4.36	6.45	5.08	5.11	6.6	6.32	5.42	4.85	5.19	3.4	5.5	4.33	3.73	5.09	4.83	4.01	5.45	4.59	4.14
Dianhong	Yunnan	Black tea	6.32	2.35	4.73	3.3	5.02	4.67	4.03	4.52	5.76	5.24	7.64	4.58	3.08	3.97	3.63	5.63	5.04	5.39	7.17	5.33	6.46	7.07	4.75	3.4	3.74	3.74	3.99	3.55	3.25	6	4.89	3.4	5.61	4.13	5.52	4.92	5.15	2.08	4.9	4.04	1.92	4.73	4.96	3.77	5.41	4.6	4.15
Fengqinghongcha	Yunnan	Black tea	5.7	2.13	4.35	3.07	5.13	4.19	4.54	5.93	5.51	5.02	7.61	4.56	3.36	3.42	2.79	4.91	5.38	5.21	6.92	4.94	6.05	6.79	4.53	5.36	3.56	3.12	3.4	3.33	4.95	6.28	5.28	3.85	6.71	4.75	5.42	4.01	4.48	2.11	5.02	3.97	2.67	4.05	4.44	3.18	4.96	4.02	4.54
Xinyanghong	Henan	Black tea	5.47	2.68	4.37	3.31	4.7	4.35	5.55	5.9	5.32	4.71	7.54	6.3	2.89	3.18	3.41	4.45	4.07	4.72	6.44	4.45	5.87	6.58	3.69	4.72	3.55	3.08	3.57	3.44	4.71	6.16	4.67	5.25	6.36	6.2	4.68	3.8	5.1	2.3	5.46	4.28	3.55	3.94	3.87	3.15	4.57	4.01	4.15
Zunyihongcha	Guizhou	Black tea	5.67	3.48	4.28	3.39	5.38	4.29	5.93	6.28	5.94	5.07	8.13	6.07	3.4	3.62	3.54	5.05	4.74	5.01	6.71	4.78	5.96	6.96	3.63	4.98	3.97	3.96	3.23	3.62	5.02	6.86	5.64	5.56	7.27	6.64	5.6	4.17	5.01	3.41	5.26	3.99	3.73	4.52	3.41	3.56	4.71	3.81	4.93
Tanyanggongfu	Fujian	Black tea	5.15	4.25	4.06	4.71	5.29	3.89	6.15	6.2	5.38	4.65	8.02	5	3.46	3.38	3.24	4.57	4.9	4.72	6.49	4.82	6.14	6.98	3.97	5.25	3.74	3.46	3.22	3.57	5.38	6.76	6.02	5.51	6.72	6.7	5.21	4	5.48	3.8	5.48	4.03	3.48	3.62	3.98	3.39	4.65	3.91	4.52
Jinluo	Yunnan	Black tea	6.44	3.41	5.34	3.42	4.28	5.38	5.07	4.57	6.17	5.9	8.1	4.36	3.46	4.59	4.28	5.66	5.6	5.89	7.48	5.51	6.74	7.2	4.8	3.7	4.35	3.92	4.29	3.99	3.81	6.11	5.13	3.93	5.84	4.65	5.73	5.15	5.55	3.4	5.47	4.34	3.39	5.34	5.55	4.19	5.99	5.09	4.07
Jinjunmei	Fujian	Black tea	6.11	3.42	4.88	3.4	4.73	4.91	5.52	5.71	5.92	5.29	8.02	5.84	3.39	4.07	3.99	5.23	4.85	5.25	7.17	4.91	6.4	6.99	3.82	4.29	3.94	3.46	4.07	3.65	4.49	6.7	5.03	5.55	6.73	6.6	5.09	4.6	5.35	3.9	5.74	4.48	3.47	4.96	4.43	4.02	5.12	4.53	4.24
Zhengshanxiaozhong	Fujian	Black tea	5.86	3.44	4.56	3.54	4.95	4.63	5.56	6.06	5.83	5.36	8.02	6.55	3.7	3.53	3.56	5.01	4.71	5.33	7.07	4.91	6.21	6.99	3.81	4.67	4.03	3.78	3.81	3.56	4.83	6.57	5.19	5.47	7.02	6.65	5.01	3.84	5.5	3.52	5.96	4.56	3.41	4.69	3.88	3.44	4.92	4.23	4.69
Yingdehongcha	Guangdong	Black tea	6.07	3.41	4.97	3.41	4.69	5.04	5.53	5.52	6.35	5.48	8.09	4.3	3.69	3.54	3.31	5.86	5.79	5.51	7.12	4.91	6.09	7.03	4.06	4.33	4.16	3.4	3.24	3.43	4.28	6.44	5.63	4.79	6.76	5.55	5.6	4.7	5.06	3.41	5.32	4.12	3.4	4.93	4.57	3.56	5.22	4.24	4.58
Yinghong	Guangdong	Black tea	6.07	3.4	4.7	3.39	4.52	4.61	5.46	5.07	6.4	5.3	8.1	4.37	3.57	3.96	3.36	5.98	5.82	5.33	6.86	4.74	5.84	7	3.64	3.86	3.85	3.77	3.24	3.4	4	6.34	5.68	5.15	6.76	5.68	5.57	4.62	4.65	3.4	4.98	3.57	3.39	4.87	4.08	3.42	4.91	4.01	4.53
Liubaocha	Guangxi	dark tea	6.19	3.44	4.84	3.46	4.68	4.84	5.68	5.19	6.6	5.11	8.2	4.61	3.87	3.49	3.3	6.15	6.06	5.15	6.85	4.61	5.93	7.17	3.61	4.21	4.05	3.87	3.48	3.75	4.53	6.41	5.84	5.32	6.92	5.93	5.73	4.62	4.98	3.39	5.11	4.01	3.62	5.04	3.87	3.7	4.76	4.11	4.69
Hubeilaoqingcha	Hubei	dark tea	6.11	4.18	5.32	4.53	4.32	5.35	5.81	6.51	6.06	6.35	8.02	6.1	3.4	4.03	4.3	5.69	5.55	6.36	7.53	6.46	7.16	7.09	6	5.28	4.4	4.97	4.81	4.68	6.05	6.77	5.37	5.68	6.29	6.19	5.16	4.86	6.34	3.65	6.52	5.36	4.47	4.94	5.29	4.27	5.89	5.2	4.58
Anhuaheicha	Hunan	dark tea	5.3	4.11	4.53	4.43	4.37	4.51	5.81	6.47	5.41	5.62	7.98	5.81	3.41	3.71	3.71	4.84	4.75	5.64	6.88	6.01	6.84	7.03	5.83	5.45	4.36	4.23	3.98	4.24	6.11	6.87	5.22	5.86	5.93	6.35	4.63	4.01	6.26	3.4	6.49	5.39	4.6	3.99	4.6	4.08	5.31	4.87	4.35
Anhuaqianliangcha	Hunan	dark tea	5.7	4.45	4.6	4.69	4.42	4.57	5.9	6.5	5.7	5.65	7.98	6.21	3.39	3.36	3.98	5	4.91	5.63	7.02	6.1	7.03	7.18	5.96	5.54	4.48	4.35	4.72	4.23	6.04	6.93	5.4	6.06	6.13	6.55	4.9	4.12	6.53	3.73	6.77	5.53	4.94	4.49	4.62	3.87	5.33	5.02	4.56
Jingweifucha	Shanxi	dark tea	5.21	4.26	4.46	4.56	4.4	4.36	5.72	6.53	5.35	5.68	7.98	5.82	3.49	3.39	3.94	4.57	4.81	5.68	6.82	6.08	6.79	7.01	5.87	5.46	4.37	4.6	4.36	4.18	6.16	6.8	5.32	5.93	5.98	6.36	4.41	3.82	6.33	3.95	6.48	5.36	4.52	3.92	4.6	3.87	5.31	4.88	4.36
Yaankangzhuancha	Sichuan	dark tea	5.25	3.4	4.88	3.37	4.15	4.8	5.81	6.69	5.49	5.8	8	6.01	3.45	3.37	3.7	5.43	5.28	5.79	7.13	6.41	7.22	7.01	5.78	4.15	4.32	4.82	4.63	4.73	6.3	6.92	5.22	5.97	5.97	6.72	4.98	3.72	6.2	3.99	6.46	5.46	4.85	3.99	4.58	4.1	5.63	5.04	4.16
Jinjiancha	Sichuan	dark tea	5.94	3.41	4.79	4.33	5.27	4.71	5.74	6.23	5.93	5.3	8.07	6.56	3.39	3.55	3.56	5.24	4.9	5.3	6.96	5.1	6.32	6.98	3.79	5.04	4.14	3.86	3.63	3.78	5.16	6.66	5.48	5.87	7.05	6.65	5.54	4.45	5.43	3.38	5.78	4.65	3.57	4.79	3.94	3.53	4.99	4.38	4.81
Chennianshupu	Yunnan	dark tea	4.55	3.4	4.93	3.57	3.97	4.9	5.47	5.95	4.57	5.65	8.09	4.52	3.39	3.46	3.31	3.76	4.05	5.68	6.02	5.32	5.43	6.9	5.04	5.04	3.98	3.84	3.23	3.86	5.58	6.8	4.48	4.03	6.34	4.88	4.05	3.56	5.02	3.4	5.62	4.51	3.36	2.68	4.67	3.87	5.41	4.83	4.31
Shengpuer	Yunnan	Green tea	6.52	4.35	6.1	5.32	5.04	6.1	5.84	6.1	6.34	7	8.05	6.22	3.57	4.7	4.9	6.29	6.09	7.01	7.8	6.9	7.45	6.77	6.28	4.44	4.74	4.49	5.47	5.34	5.01	5.96	5.78	4.23	6.8	5.16	5.76	5.41	6.3	3.4	6.6	5.42	3.4	5.39	6.14	4.77	6.71	5.86	4.96
Zunyimaofeng	Guizhou	Green tea	6.6	3.17	5.34	3.78	5.32	4.93	4.18	5.31	5.4	6.19	7.64	5.93	3.57	4.43	4.92	6.43	5.62	6.53	7.61	6.93	7.52	6.51	6.25	3.89	4.97	4.79	5.27	4.48	4.59	5.61	5.32	3.47	6.3	4.48	5.76	5.46	6.18	2.24	6.61	5.53	3.05	4.58	5.54	4.57	6.28	5.57	4.92
Taipinghoukui	Anhui	Green tea	6.21	3.27	3.87	3.39	5.23	5.72	4.23	5.65	5.73	4.89	7.58	5.82	3.49	3.93	4.12	5.84	5.56	6.03	7.28	6.73	7.38	6.58	5.43	5.31	4.95	5.27	4.86	5.28	5.1	5.77	5.66	6.36	6.23	6.7	5.72	5.17	6.12	3.58	6.2	5.3	4.95	4.63	4.72	4.34	5.98	5.26	4.11
Jingtingxuelv	Anhui	Green tea	6.23	4.03	3.94	4.13	5.06	5.38	4.11	5.8	5.64	5.69	7.62	5.69	3.44	4.47	4.97	5.37	5.31	6.5	7.34	6.99	7.4	6.13	6.22	5.28	4.43	4.6	5.7	5.02	5.25	6.1	5.21	6.18	6.08	6.65	5.61	4.35	6.26	3.92	6.53	5.36	5.22	4.68	5.34	4.8	6.33	5.69	4.01
Yongxihuoqing	Anhui	Green tea	5.38	5.2	3.71	5.26	4.64	4.88	3.93	6.13	5.64	5.34	7.39	6.25	3.15	3.61	4.4	4.74	5.14	6.49	7.14	7.07	7.27	5.79	6.3	5.65	4.38	3.96	5.31	5.08	5.37	5.37	5	5.99	5.41	6.28	5.35	3.25	6.34	3.21	6.52	5.62	4.54	3.75	4.67	4.23	5.82	5.24	3.92
Xiuningsongluo	Anhui	Green tea	5.95	4.68	4.1	4.62	5.21	5.1	4.33	6.13	5.46	5.41	7.44	6.04	3.16	3.64	4.46	4.71	5.01	6.36	7.1	7.01	7.3	5.86	6.1	5.55	4.39	3.42	5.38	4.88	5.36	5.63	4.8	6.08	5.55	6.53	5.43	3.27	6.27	3.49	6.72	5.23	4.96	4.36	5.1	4.49	6.08	5.47	3.92
Huangshansongluocha	Anhui	Green tea	6.28	4.4	4.8	4.45	5.33	5.51	4.04	5.75	6.06	5.55	7.56	5.86	3.63	4.11	4.58	6.74	5.78	6.28	7.31	6.84	7.36	6.33	6.01	4.88	4.38	4.58	5.3	4.93	5.23	5.92	5.4	6.19	6.29	6.55	5.48	5.13	6.11	3.68	6.34	5.25	4.72	4.78	5.18	4.46	6.07	5.39	4.03
Xiaokengmaofeng	Anhui	Green tea	6.11	4.11	4.04	4.11	5.39	5.38	4.45	5.85	5.83	5.6	7.52	5.89	3.41	4.09	4.4	5.74	5.5	6.5	7.22	6.93	7.28	6.11	6	4.76	4.36	4.69	5.2	4.97	5.16	5.69	5.37	6.19	6.1	6.64	5.67	4.77	6.25	3.84	6.31	5.42	5.1	4.59	5.24	4.91	6.45	5.82	4.07
Huangkui	Anhui	Green tea	6.13	5.29	3.54	5.48	5.29	5.22	4.42	5.48	5.99	5.68	7.59	5.71	3.97	4.48	4.76	5.68	5.78	6.46	7.34	6.8	7.27	6.21	6	4.72	4.49	4.89	5.22	4.67	4.6	5.81	5.63	6.24	6.31	6.6	5.55	4.94	6.44	3.85	6.47	5.45	5.02	4.64	5.35	4.61	6.17	5.55	4.21
Tongchengxiaohua	Anhui	Green tea	6.19	3.82	3.48	3.93	5.09	5.57	4.36	5.36	6.25	5.41	7.53	5.67	3.71	4.08	4.25	6.17	5.73	6.28	7.25	6.69	7.26	6.24	5.7	4.24	4.69	5.03	4.89	4.84	4.62	5.8	5.58	6.27	6.13	6.58	5.62	5.13	5.89	3.63	5.81	5.04	4.7	4.72	5.06	4.66	6.27	5.6	3.86
Huangshanmaofeng	Anhui	Green tea	6.16	4.8	4.04	4.96	5.41	5.5	4.65	5.39	6.21	5.35	7.51	5.68	3.81	3.95	4.16	6.15	5.89	6.13	7.21	6.53	7.2	6.41	5.59	4.11	4.45	4.76	4.72	4.78	4.47	5.72	5.73	6.38	6.15	6.4	5.5	5.19	5.99	3.7	5.78	4.88	4.53	4.71	5.02	4.43	6.04	5.36	3.78
Xiazhoubifeng	Hubei	Green tea	6.07	4.31	4.23	4.2	5.29	5.43	4.66	5.84	6.04	5.34	7.51	5.92	3.39	3.76	4.3	5.81	5.66	6.34	7.17	6.83	7.2	6.11	5.8	4.3	4.46	4.69	5.03	4.9	5.08	5.92	5.47	6.24	6.31	6.68	5.44	4.92	6.04	3.9	6.1	5.17	4.94	4.6	4.96	4.57	6.19	5.55	3.9
Yingshanyunwu	Hubei	Green tea	6.03	4.97	3.83	5.13	5.29	5.22	4.76	5.68	5.94	5.44	7.45	5.98	3.38	3.89	4.53	5.81	5.7	6.34	7.17	6.82	7.16	5.93	5.92	4.34	4.22	4.45	5.3	4.65	4.88	5.55	5.83	6.45	6.28	6.53	5.39	4.86	6.29	4.24	6.26	5.28	4.82	4.57	5	4.45	6.06	5.48	4.17
Anhuasongzhen	Hunan	Green tea	5.8	2.16	4.61	2.92	5.26	4.78	4.05	5.77	5.79	5.32	7.5	4.96	3.28	3.6	3.45	5.51	5.54	5.75	6.96	5.38	6.33	6.62	4.77	4.21	3.79	3.49	3.94	3.85	4.36	5.98	5.19	4.21	6.43	5.44	5.24	4.43	5.1	2.75	5.4	4.39	2.77	4.29	4.68	3.54	5.38	4.51	4.39
Guzhangmaojian	Hunan	Green tea	6.04	4.19	3.99	4.14	5.48	5.32	4.25	5.82	5.83	5.46	7.5	5.87	3.39	3.84	4.4	5.57	5.56	6.35	7.1	6.81	7.05	5.97	5.82	4.07	4.41	4.6	5.05	4.86	5.01	5.82	5.47	6.19	6.2	6.6	5.43	4.83	6.1	3.94	6.18	5.24	4.97	4.52	5.18	4.65	6.27	5.62	3.9
Biluochun	Hunan	Green tea	6.13	3.86	4.33	4.16	4.85	5.25	3.79	5.24	6.2	5.49	7.5	5.52	3.4	4.25	4.64	5.75	5.27	6.22	7.14	6.53	6.99	6	5.7	3.28	3.77	3.62	5.03	4.79	4.02	5.67	4.92	5.75	6.18	6.07	5.37	5	5.83	4.02	5.9	4.95	4.51	4.53	5.25	4.6	6.13	5.51	3.83
Yuhuacha	Jiangsu	Green tea	6.09	2.95	3.57	2.99	5.12	5.35	3.8	5.28	6.17	5.28	7.46	5.62	3.64	3.92	4.06	5.87	5.59	6.16	7.04	6.5	6.97	6.02	5.41	3.51	4.46	4.8	4.58	4.6	4.3	5.78	5.35	6.07	6.02	6.49	5.38	5.05	5.89	3.95	5.9	5.05	4.82	4.52	4.99	4.53	6.16	5.48	3.71
Yangxianxueya	Jiangsu	Green tea	6.08	2.42	3.44	3.14	4.19	5.11	3.33	4.96	6.05	5.23	7.44	5.44	3.32	4.12	4.26	5.89	5.34	5.79	7.04	6.04	6.88	6.44	5.33	3.37	4.24	4.53	4.73	4.52	3.75	5.48	4.85	4.97	5.91	5.64	5.27	5.17	5.54	2.83	5.58	4.67	3.71	4.55	5.22	4.23	5.95	5.13	3.78
Jintanqueshe	Jiangsu	Green tea	6.08	4.26	3.34	4.35	4.94	5.24	3.67	4.9	5.99	5.25	7.44	5.75	3.88	4.08	4.26	5.97	5.8	5.93	7.04	6.41	6.94	6.07	5.51	2.92	4.21	4.42	4.81	4.61	3.58	5.58	5.16	5.97	5.71	6.24	5.07	5.12	5.72	3.97	5.63	4.68	4.62	4.59	5.01	4.34	5.9	5.26	3.42
Huaguoshanyunwucha	Jiangsu	Green tea	5.96	3.73	3.49	3.86	5.03	5.28	3.55	5.5	5.93	5.53	7.35	6.03	3.38	3.8	4.36	6.13	5.6	6.13	7.02	6.55	6.89	5.97	5.75	3.73	3.99	4.23	4.94	4.74	4.65	5.73	5.26	5.69	6.29	6.29	5.07	4.88	5.83	3.98	6.02	5.04	4.48	4.48	5.16	4.35	6.01	5.31	4.04
Zhenghebaimaohou	Fujian	Green tea	6	2.46	3.35	3.18	4.3	5.18	3.27	4.78	5.94	5.61	7.38	5.46	3.39	4.04	4.38	6.18	5.53	6.04	7.02	6.27	6.83	6.32	5.64	2.96	4.03	4.13	4.84	4.51	3.56	5.52	5.12	3.37	6.14	4.04	5	5.07	5.8	2.06	5.97	4.96	2.19	4.55	5.25	4.15	5.87	5.1	4.14
Suichuangougunao	Jiangxi	Green tea	5.97	3.62	3.26	3.8	4.52	5.13	3.23	5.11	5.82	5.65	7.34	5.58	3.24	3.91	4.39	6.2	5.5	6.12	7.01	6.39	6.82	6.01	5.71	2.86	3.87	3.91	4.84	4.53	4.21	5.49	5.2	4.79	6.22	5.52	5.02	4.99	5.84	2.77	6.08	5.09	3.47	4.52	5.2	4.21	5.9	5.15	4.23
Wuyuanmingmei	Jiangxi	Green tea	5.79	4.42	3.33	4.59	5.19	4.98	3.54	5.7	5.61	5.1	7.3	5.78	3.19	3.53	4.14	5.57	5.39	5.98	6.86	6.57	6.84	5.77	5.62	3.85	4.1	4.23	4.78	4.47	5.03	5.69	5.46	6.19	6.18	6.41	5.01	4.49	5.93	3.92	6.02	5.01	4.6	4.32	4.72	4.06	5.71	5.05	3.8
Fengchengluofengcha	Jiangxi	Green tea	6.16	4.34	5.35	4.35	5.49	5.36	5.93	6.2	6.11	6.52	7.69	6.2	3.31	3.76	4.45	5.52	5.55	6.52	7.28	7.02	7.27	6.08	5.98	4.61	4.25	4.34	5.16	4.9	5.61	5.88	5.44	6.2	6.3	6.79	5.49	4.62	6.33	3.93	6.54	5.44	5.14	4.56	5.18	4.57	6.26	5.63	4.15
Shangraobaimei	Jiangxi	Green tea	6.3	4.92	5.58	5.05	5.32	5.59	5.74	5.55	6.42	6.29	7.71	5.9	3.98	4.22	4.38	6.21	6.09	6.29	7.34	6.67	7.26	6.48	5.68	3.84	4.39	4.79	4.87	4.88	4.57	5.79	5.95	6.53	6.27	6.56	5.57	5.33	6.11	4.14	5.89	5.03	4.74	4.85	5.31	4.61	6.25	5.56	3.84
Rizhaolvcha	Shandong	Green tea	6.13	4.59	5.34	4.59	5.53	5.36	5.89	6.15	5.68	6.37	7.7	6.12	3.35	3.77	4.57	5.81	5.77	6.37	7.27	6.95	7.28	6.1	6	4.22	4.15	4.21	5.27	4.92	5.49	6.06	5.66	6.44	6.62	6.77	5.54	4.52	6.26	4.23	6.48	5.4	4.89	4.69	5.07	4.5	6.09	5.47	4.17
Yimengbiya	Shandong	Green tea	6.19	3.33	5.66	3.42	5.41	5.67	5.8	5.56	6.19	6.45	7.67	6.37	3.57	3.97	4.62	5.66	5.71	6.45	7.31	6.9	7.26	6.13	5.8	4.36	4.74	5.06	5.26	5.07	5	5.63	5.87	6.41	6.58	6.82	5.61	5.01	6.34	4.21	6.48	5.49	5.24	4.78	5.05	4.58	6.22	5.59	4.31
Qinbawuhao	Shanxi	Green tea	6.16	4.26	5.41	4.47	5.24	5.41	5.62	5.74	6.11	6.41	7.64	6.42	3.42	4.07	4.65	5.87	5.64	6.41	7.3	6.82	7.2	6.26	5.9	4.14	4.21	4.4	5.16	4.92	4.87	5.85	5.42	5.97	6.71	6.62	5.52	5.05	6.13	3.94	6.43	5.32	4.9	4.77	5.09	4.5	6.09	5.45	4.29
Ziyangmaojian	Shanxi	Green tea	6.15	4.09	5.4	4.11	5.42	5.4	5.79	5.69	5.79	6.44	7.66	5.9	3.49	4.11	4.69	5.71	5.69	6.44	7.28	6.86	7.21	6.22	5.89	4.26	4.49	4.74	5.21	4.93	4.98	5.93	5.63	6.31	6.34	6.77	5.54	4.9	6.35	4.2	6.47	5.45	5.24	4.74	5.16	4.63	6.26	5.65	4.14
Pinglinvwayinfeng	Shanxi	Green tea	6.22	4.8	5.54	4.92	5.26	5.52	5.68	5.33	6.32	6.25	7.65	5.77	3.92	4	4.29	6	5.99	6.25	7.25	6.62	7.17	6.27	5.67	3.6	4.33	4.56	4.94	4.88	4.23	5.62	5.82	6.43	6.17	6.45	5.51	5.24	6.01	4.08	5.78	4.91	4.59	4.78	5.25	4.58	6.21	5.55	3.75
Hanshuiyinsuo	Shanxi	Green tea	6.17	5.03	5.35	5.24	5.34	5.35	5.66	5.59	6.05	6.31	7.66	5.65	3.56	4.2	4.79	5.73	5.55	6.31	7.26	6.72	7.18	6.12	5.9	4.11	4.21	4.36	5.31	4.79	4.7	5.67	5.71	6.37	6.31	6.61	5.51	4.84	6.37	4.29	6.42	5.36	5.07	4.68	5.25	4.5	6.1	5.46	4.1
Shangnanquanming	Shanxi	Green tea	6.14	5.12	5.44	5.23	5.34	5.43	5.68	5.7	6.06	6.21	7.59	5.91	3.66	3.95	4.52	5.83	5.76	6.22	7.21	6.7	7.17	6.21	5.76	4.13	4.43	4.73	5.11	4.84	4.84	5.85	5.94	6.52	6.27	6.5	5.39	4.96	6.32	4.37	6.17	5.17	4.78	4.7	4.99	4.33	5.95	5.38	4.08
Jinggangbiyu	Shanxi	Green tea	6.08	4.97	5.28	5.12	5.4	5.26	5.72	5.71	6.07	6.32	7.55	5.99	3.53	3.99	4.53	5.71	5.75	6.33	7.19	6.78	7.14	6.01	5.84	4.14	4.29	4.51	5.14	4.72	4.88	5.57	5.82	6.5	6.29	6.62	5.37	4.91	6.29	4.4	6.29	5.26	4.9	4.65	4.99	4.47	6.04	5.44	4.05
Wuzixianhao	Shanxi	Green tea	6.15	2.3	5.43	3.14	4.26	5.43	4.82	4.71	6.17	5.83	7.58	5.5	3.58	4.2	4.23	6.03	5.68	5.83	7.2	6.1	7.07	6.5	5.41	3.35	4.68	5.04	4.77	4.77	3.81	5.37	5.17	5.74	5.65	5.96	5.43	5.26	5.69	3.44	5.54	4.64	4.22	4.78	5.14	4.22	5.9	5.12	3.77
Wenxianlvcha	Gansu	Green tea	6.37	4.52	5.5	4.56	5.23	5.5	5.7	5.94	6.3	6.45	7.75	6.48	3.63	4.3	4.98	6.1	5.63	6.45	7.42	6.86	7.36	6.23	6.06	4.3	4.46	4.36	5.52	5.02	5.03	5.76	5.31	5.91	6.64	6.51	5.55	4.82	6.25	3.94	6.59	5.4	4.8	4.79	5.27	4.64	6.18	5.53	4.37
Shaoguanbaimaocha	Guangdong	Green tea	6.03	3.43	5.12	3.56	4.97	5.1	5.63	5.7	5.7	5.48	7.78	5.62	3.37	3.8	3.99	5.53	5.24	5.49	7.13	5.89	7.08	6.67	4.72	5.34	4.65	5.09	4.55	4.52	5.18	6.09	5.22	5.96	6.04	6.42	5.52	4.85	6.02	3.75	6.29	5.14	4.68	4.51	4.6	4.2	5.75	4.99	4.21
Lingyunbaihao	Guangxi	Green tea	6.35	3.14	5.71	3.59	4.83	5.7	5.31	5.3	6.31	6.37	7.73	5.87	3.71	4.37	4.77	6.83	6.06	6.37	7.45	6.6	7.3	6.41	5.95	3.62	4.24	4.3	5.32	5.08	4.09	5.68	5.33	3.92	6.57	4.84	5.52	5.28	5.98	2.71	6.22	5.22	2.8	4.94	5.61	4.66	6.3	5.57	4.34
Qintangmaojian	Guangxi	Green tea	6.28	3.73	5.7	3.85	5.38	5.7	5.72	5.63	6.18	6.37	7.77	5.87	3.79	4.2	4.52	6.13	5.83	6.38	7.38	6.8	7.32	6.37	5.72	4.25	4.77	5.21	5.14	5.04	4.9	5.89	5.62	6.29	6.3	6.7	5.66	5.19	6.16	4.09	6.24	5.25	4.98	4.85	5.18	4.71	6.33	5.65	4.14
Shiqiantaicha	Guizhou	Green tea	6.21	3.7	5.43	3.87	5.37	5.43	5.73	5.65	6.09	6.33	7.71	6.25	3.37	4.08	4.6	5.82	5.64	6.33	7.37	6.71	7.25	6.42	5.72	4.44	4.47	4.99	5	4.94	4.92	5.98	5.81	6.37	6.59	6.39	5.5	5.01	6.36	4	6.34	5.24	4.67	4.79	5.12	4.43	6.1	5.39	4.22
Meitancuiya	Guizhou	Green tea	6.36	2.8	5.25	3.1	4.38	5.25	4.74	4.14	6.6	6.03	7.68	5.59	3.92	4.3	4.27	7.1	5.98	6.04	7.43	5.98	7.24	6.3	5.31	2.66	3.94	4.19	4.4	4.48	3.43	5.41	4.74	5.18	5.81	6	5.53	5.42	5.42	3.28	5.55	4.47	3.83	4.98	5.43	4.47	6.13	5.39	3.76
Fanjingshancuifengcha	Guizhou	Green tea	6.28	4.57	5.46	4.62	5.23	5.45	5.64	5.05	6.04	6.27	7.74	5.96	3.86	4.24	4.49	6.13	5.98	6.27	7.33	6.67	7.26	6.27	5.71	3.3	4.33	4.59	5.21	4.83	3.82	5.67	5.26	6.05	5.87	6.29	5.49	5.19	6.05	4.03	5.9	4.96	4.81	4.86	5.39	4.73	6.3	5.63	3.53
Leigongshanyinqiucha	Guizhou	Green tea	6.21	2.79	5.7	3.64	4.75	5.69	5.49	5.62	6.07	6.59	7.63	5.98	3.41	4.21	4.38	6.02	5.77	6.6	7.45	6.52	7.09	6.38	6	3.91	4.14	4.31	5.03	4.99	4.55	5.47	5.26	4.09	6.28	4.85	5.3	5	5.82	2.8	6.13	4.94	2.82	4.79	5.73	4.38	6.26	5.37	4.52
Fenggangfuxicha	Guizhou	Green tea	6.06	4.36	5.4	4.42	5.28	5.4	5.76	5.97	5.65	6.38	7.69	5.86	3.4	4.27	5.07	5.28	5.31	6.37	7.29	6.9	7.27	6	6.01	4.85	4.41	4.68	5.82	4.99	5.52	5.68	5.43	6.17	6.27	6.59	5.44	4.04	6.4	4.22	6.59	5.4	5.09	4.61	5.22	4.52	6.16	5.55	4.08
Baishalvcha	Hainan	Green tea	5.88	4.54	5.07	4.53	5.46	5.07	5.7	6.1	5.38	6.25	7.49	5.95	3.06	3.67	4.69	4.57	5.01	6.25	7.04	6.86	7.16	5.6	5.85	5.11	4.09	3.3	5.51	4.87	5.25	5.44	4.71	5.89	5.47	6.36	5.2	3.56	6.24	3.82	6.6	5.15	4.91	4.34	5.23	4.52	6.09	5.49	3.87
Hainandabaihao	Hainan	Green tea	6.27	2.59	5.38	3.19	3.79	5.36	4.38	3.98	6.09	5.67	7.67	5.28	3.48	4.23	4.56	6.07	5.53	5.68	7.27	5.9	7.16	6.3	5.36	2.77	4.25	4.4	5.19	4.6	4.05	5.17	4.81	2.99	5.43	3.44	5.3	5.23	5.54	2.81	5.47	4.36	2.58	4.77	5.34	4.11	5.93	5.1	3.67
Wuzhishanlvcha	Hainan	Green tea	5.88	4.23	5.14	4.28	5.34	5.13	5.7	6.16	5.99	6.3	7.55	5.94	3.08	3.94	4.63	5.41	5.28	6.3	7.19	6.77	7.16	5.63	5.76	4.37	4.03	4.04	5.3	4.91	5.56	5.37	5.01	5.67	5.94	6.36	5.23	3.91	6.19	3.62	6.45	5.26	4.86	4.32	5.05	4.43	6.03	5.44	3.97
Xinyangjingangtaimaojian	Henan	Green tea	6.09	3.82	5.24	3.84	5.24	5.26	5.64	5.64	5.9	6.29	7.61	5.64	3.49	4.14	4.66	5.64	5.42	6.29	7.19	6.68	7.14	5.86	5.65	4.16	4.47	4.86	5.33	4.79	4.93	5.54	5.24	5.95	5.99	6.44	5.54	4.56	6.12	3.86	6.24	5.25	4.89	4.56	5.24	4.7	6.26	5.67	3.86
Enshiyulu	Hubei	Green tea	6.04	4.26	5.19	4.36	5.28	5.18	5.64	5.84	5.72	6.17	7.59	5.87	3.32	3.83	4.54	5.75	5.52	6.17	7.16	6.67	7.14	5.88	5.68	4.1	4.39	4.73	5.27	4.78	5.13	5.75	5.54	6.18	6.35	6.37	5.43	4.49	6.14	3.91	6.25	5.17	4.56	4.51	5.03	4.41	6	5.39	3.94
Yangtianxuelv	Henan	Green tea	6.11	4.64	5.29	4.74	5.23	5.29	5.58	5.55	5.99	6.13	7.59	5.79	3.46	3.92	4.57	5.76	5.65	6.13	7.15	6.61	7.12	5.97	5.57	3.87	4.32	4.47	5.2	4.71	4.71	5.62	5.68	6.18	6.27	6.4	5.34	4.81	6.09	3.94	6.12	5.06	4.72	4.59	5.02	4.38	6	5.37	3.88
Tongbaiyuye	Henan	Green tea	6.11	4.6	5.31	4.71	5.07	5.31	5.48	5.39	6.02	5.95	7.57	5.49	3.64	3.97	4.51	6.02	5.72	5.96	7.16	6.41	7.1	6.08	5.5	3.71	4.37	4.61	5.17	4.64	4.62	5.59	5.51	6.07	6.15	6.27	5.24	4.88	6.03	3.93	6.06	4.97	4.55	4.65	5	4.37	5.92	5.29	3.89
Caihuamaojian	Hubei	Green tea	6.58	4.51	5.7	4.81	5.47	5.7	5.97	6.28	6.52	6.79	8.13	6.83	3.72	4.46	5.09	6.25	5.99	6.81	7.75	7.19	7.67	6.54	6.32	4.61	4.75	4.71	5.75	5.28	5.51	6.31	5.77	6.12	7.04	6.83	5.86	5.11	6.62	3.84	6.95	5.75	5.05	5.35	5.55	4.92	6.47	5.84	4.76
Qingchengxueya	Sichuan	Green tea	6.65	3.4	6.01	3.87	5.04	6.01	5.48	5.48	6.51	6.75	8.15	6.13	3.86	4.69	4.92	7.07	6.48	6.75	7.83	6.91	7.65	6.64	6.25	3.68	4.91	4.79	5.65	5.44	4.58	6.27	5.88	4.06	6.99	4.52	5.75	5.58	6.45	3.53	6.68	5.59	3.42	5.59	5.98	4.98	6.63	5.89	4.86
Bashanyinhao	Chongqing	Green tea	6.44	3.4	5.39	3.89	4.15	5.39	5.3	4.36	6.3	5.82	8.06	5.04	3.39	4.42	4.7	5.98	5.49	5.8	7.48	5.92	7.32	6.91	5.33	3.46	4.7	4.77	5.26	4.59	3.45	5.6	4.94	3.56	5.58	4.09	5.74	5.43	5.94	3.38	5.78	4.79	3.4	5.29	5.8	4.3	6.23	5.35	4.07
Yabaocha	Yunnan	Green tea	3.86	3.41	4.98	3.7	3.2	4.92	3.22	6.14	5.05	5.39	6.28	5.5	3.38	3.46	3.31	5	3.7	5.46	5.47	4.05	5.03	6.71	3.3	5.81	3.85	3.38	3.28	3.39	4.71	5.89	5.05	3.61	5.96	4.01	5.37	3.59	4.17	3.39	4.27	3.46	3.35	2.73	5.82	3.7	5.72	4.83	4.08
Emeimaofeng	Sichuan	Green tea	6.41	3.4	5.57	3.58	5.37	5.57	5.84	5.86	6.07	6.54	8.06	5.52	3.69	4.39	4.9	5.87	5.76	6.56	7.53	6.9	7.47	6.31	5.84	4.46	4.97	5.29	5.45	5.01	5.31	6.17	5.64	5.98	6.47	6.65	5.76	4.96	6.33	3.95	6.54	5.42	5.04	5.24	5.37	4.94	6.41	5.84	3.92
Baxianyunwu	Shanxi	Green tea	6.25	4.71	5.41	4.7	5.65	5.37	6.18	6.24	5.89	6.65	7.96	5.95	3.47	4.17	4.74	5.62	5.78	6.67	7.4	7.07	7.41	6.1	6.05	4.68	4.89	4.59	5.39	5	5.44	6.15	5.73	6.26	6.37	6.65	5.66	4.69	6.45	3.96	6.55	5.49	4.97	4.99	5.54	4.96	6.56	5.92	4.19
Anjibaicha	Zhejiang	Green tea	6.41	3.4	5.32	3.58	5.45	5.33	5.93	5.64	6.85	6.26	7.95	5.95	3.57	4.1	4.83	6.28	5.88	6.26	7.43	6.78	7.46	6.15	5.73	4.61	4.65	4.38	5.52	4.77	4.67	5.79	5.86	6.07	6.4	6.42	5.68	5.12	6.44	3.8	6.25	5.39	4.88	5.12	5.27	4.55	6.18	5.52	4.09
Mengdingganlu	Sichuan	Green tea	6.4	5.16	5.46	5.27	5.27	5.41	5.63	5.59	6.47	6.53	7.97	5.88	3.66	4.19	4.75	5.94	6.11	6.54	7.47	6.89	7.42	5.97	5.99	3.88	4.91	4.83	5.46	4.87	4.61	5.7	5.79	6.13	6.35	6.41	5.6	5.05	6.15	3.51	6.12	5.06	4.7	5.1	5.56	4.98	6.51	5.88	3.7
Dingjunmingmei	Shanxi	Green tea	6.35	4.53	5.52	4.75	4.62	5.48	5.11	5.27	6.9	6.29	7.93	6.02	3.98	4.01	4.64	6.81	6.3	6.28	7.45	6.57	7.38	6.2	5.71	3.62	4.9	5.19	5.26	4.67	4.59	5.8	5.65	6.02	6.37	6.27	5.69	5.25	5.88	3.74	5.85	5.07	4.05	5.01	5.35	4.62	6.29	5.58	3.68
Xufulongya	Sichuan	Green tea	6.46	3.41	5.3	3.59	4.35	5.29	4.77	4.28	6.6	6.21	7.92	5.5	3.56	4.39	4.29	7.16	6.08	6.21	7.51	6.28	7.35	6.17	5.37	3.41	4.46	4.29	4.69	4.56	3.58	5.57	4.89	4.8	6.08	5.9	5.6	5.42	5.67	3.43	5.77	4.64	3.48	5.19	5.52	4.65	6.27	5.51	3.78
Mengdingshancha	Sichuan	Green tea	6.42	3.43	5.66	3.4	4.49	5.65	5.14	5.49	6.35	6.23	7.9	5.55	3.63	4.18	4.52	7.01	6.13	6.24	7.45	6.46	7.33	6.38	5.65	3.45	4.46	4.49	5.11	4.92	4.13	5.99	5.02	3.99	6.54	4.9	5.6	5.22	5.69	3.41	5.99	4.93	3.36	5.13	5.57	4.58	6.26	5.5	4.06
Longjing	Zhejiang	Green tea	6.25	4.49	5.23	4.65	4.88	5.21	5.46	5.4	6.52	6.19	7.83	5.8	3.69	4.23	4.73	6.4	5.99	6.2	7.31	6.57	7.27	6.09	5.84	4.31	4.67	4.67	5.44	4.4	4.69	5.74	5.45	5.82	6.24	6.26	5.5	4.9	5.97	3.41	6.07	5.01	4.43	4.93	5.29	4.54	6.19	5.47	3.63
Zhufengshengcha	Xizang	Green tea	5.98	3.4	4.96	3.58	4.72	5.01	5.08	5.91	5.83	5.99	7.91	4.78	3.75	3.69	3.23	5.69	5.68	5.97	7.2	5.28	6.38	6.64	4.46	4.33	4.33	3.84	4.08	3.4	4.58	6.03	5.38	4.19	6.58	5.3	5.28	4.4	5.21	3.41	5.55	4.33	3.4	4.6	4.96	4.03	5.72	4.79	4.58
Qionglaiwenjuncha	Sichuan	Green tea	5.66	3.41	4.54	3.63	4.64	4.43	5.36	5.7	5.6	4.99	7.83	6.11	3.4	3.54	3.42	4.93	4.42	5.07	6.76	4.68	5.9	6.7	3.32	4.46	3.97	3.39	3.3	3.5	4.58	6.28	5.01	5.12	6.78	6.24	4.8	3.72	5.14	3.46	5.65	4.33	3.4	4.34	3.87	3.57	4.7	3.52	4.31
Guzhuzisun	Zhejiang	Green tea	6.21	4.81	5.43	4.92	5.14	5.46	5.46	5.34	6.25	6.1	7.85	5.6	3.82	3.5	4.06	6.2	6.07	6.08	7.28	6.52	7.24	6.24	5.41	3.94	4.76	4.93	4.86	4.67	4.31	5.75	5.92	6.17	6.25	6.19	5.43	5.16	6.02	3.65	5.86	4.88	4.18	4.97	4.92	4.11	6	5.31	3.73
Menghaifoxiangcha	Yunnan	Green tea	4.2	3.42	3.98	3.41	3.55	4.09	4.8	5.58	4.15	5.16	7.79	4.29	3.41	3.4	3.26	3.62	3.7	5.19	5.62	4.8	5.09	6.36	4.57	4.38	3.84	3.39	3.31	3.4	5.29	6.31	4.1	3.58	5.76	4.13	3.51	3.2	4.79	3.41	5.24	3.8	3.41	3.08	4.05	3.46	4.94	4.44	4.06
Lipingbaicha	Guizhou	Green tea	6.19	3.43	4.99	3.42	5.17	5.06	5.59	5.51	5.96	5.97	7.81	5.55	3.4	3.65	4.33	5.59	5.68	5.98	7.13	6.52	7.17	6.1	5.35	4.48	4.15	4.01	5	4.52	4.59	5.81	5.75	6.01	6.35	6.3	5.63	5.08	6.15	3.37	5.98	5.02	4.61	4.97	4.91	3.99	5.9	5.21	3.95
Zhenganbaicha	Guizhou	Green tea	6.05	3.41	4.71	3.4	5.08	4.8	5.69	5.68	5.89	6.09	7.71	5.52	3.39	3.66	4.3	5.4	5.42	6.1	7.03	6.55	7.09	6.15	5.53	4.9	4.33	3.88	4.96	4.43	4.77	5.49	5.61	5.84	6.26	6.28	5.61	4.89	6.24	3.42	6.09	5.2	4.68	4.73	5.1	4.21	5.94	5.2	4.12
Molihuacha	Guangdong	Green tea	5.85	3.7	5.12	4.58	4.43	5.06	5.22	5.72	5.5	6.44	7.61	6.13	3.39	4.07	4.61	5.88	5.47	6.43	7.22	6.52	6.98	5.95	5.95	4.18	4.27	3.8	5.42	4.56	5.12	5.53	4.8	4.69	6.16	5.02	5.28	4.24	5.63	3.39	6.42	4.87	3.54	4.61	5.5	4.1	6.22	5.4	4.18
Xinyangmaojian	Henan	Green tea	5.99	3.4	4.86	3.4	5.25	4.85	5.76	5.42	5.99	6.09	7.67	5.59	3.4	3.34	4.32	5.36	5.44	6.1	7.03	6.56	7.08	5.89	5.54	4.49	4.47	3.9	5.05	4.44	4.61	5.51	5.44	5.71	6.09	6.17	5.54	4.76	6.25	3.41	6.08	5.23	4.67	4.77	5.22	4.31	6.01	5.3	3.91
Fudingbaichayinzhen	Fujian	Green tea	6.01	2.42	5.23	2.91	4.08	5.21	4.85	5.09	6.27	5.69	7.51	5.71	3.74	4.09	3.95	6.03	5.6	5.7	7.11	5.99	7	6.53	4.99	4.12	5.09	5.39	4.58	4.62	4.22	5.49	5.13	5.87	5.51	6.11	5.43	5.09	5.56	3.51	5.49	4.88	4.24	4.63	4.91	4.31	6.01	5.2	3.79
Meizhan	Fujian	Oolong tea	6.28	4.62	5.28	5.36	5.12	5.28	5.36	5.5	6.22	5.93	7.9	6.31	3.57	4.53	4.79	4.94	5.42	5.94	7.34	6.17	7.03	6.82	5.29	4.66	4	3.61	5.09	4.67	4.39	6.06	5.22	6.17	5.74	6.42	5.34	4.26	5.88	4.06	5.87	4.86	4.76	4.7	5.36	4.27	5.9	5.13	3.79
Heizhenzhucha	Fujian	Oolong tea	5.39	4.9	4.62	4.96	4.03	4.62	5.8	5.61	5.04	5.45	7.37	5.84	2.76	3.37	3.98	4.34	4.65	5.46	6.71	6.24	6.88	6.42	5.82	5.18	4.28	4.42	4.79	4.46	5.45	6.21	5.13	5.23	5.85	6.42	4.19	3.82	6.35	2.76	6.46	5.08	4.44	3.91	4.5	3.53	5.33	4.66	4.04
Jinmudan	Fujian	Oolong tea	5.78	5.58	4.98	5.84	4.96	4.98	6.17	6.33	5.55	6.19	8	6.23	3.39	3.6	4.05	5.02	5.62	6.21	7.3	6.74	7.33	6.92	6.15	5.47	4.06	3.86	4.75	4.88	5.48	6.64	5.44	6	6.25	6.72	5.16	4.45	6.33	3.53	6.56	5.42	4.29	4.42	5.08	4.07	5.96	5.21	4.45
Dongdingwulong	Taiwan	Oolong tea	5.77	5.23	4.89	5.36	4.77	4.86	4.61	5.81	5.81	6.35	7.53	6.38	2.79	3.48	4.41	4.71	4.91	6.35	7.17	6.97	7.25	5.74	6.08	5.34	3.97	3.13	5.36	5.31	4.87	4.76	4.74	5.09	5.29	5.85	5.25	4.14	6.55	3.2	6.84	5.91	4.32	4.3	4.66	4.14	5.74	5.11	3.83
Alishancha	Taiwan	Oolong tea	5.56	5.4	4.9	5.34	5.15	4.93	5.9	6.1	5.61	6.18	7.47	6.08	2.67	3.45	4.42	4.65	4.87	6.18	6.94	6.88	7.14	5.84	5.83	5.14	3.75	3.47	5.32	4.81	5.48	5.45	5.58	5.5	6.16	6.5	5.28	3.58	6.58	2.65	6.58	5.35	4.5	4.05	4.87	4.15	5.79	5.22	4.28
Jinguanyin	Fujian	Oolong tea	5.67	4.3	5.57	4.43	4.87	5.57	5.53	5.52	6.12	5.4	8.03	5.19	3.38	3.67	3.54	5.46	5.07	5.37	6.96	5.94	6.63	6.81	5.14	4.76	4.09	3.68	3.96	4.07	4.75	6.32	6.11	4.84	6.58	5.66	5.61	4.35	5.36	3.39	5.5	4.71	3.41	4.51	4.19	3.69	5.13	4.61	4.65
Tieguanyin	Fujian	Oolong tea	5.71	5.04	4.75	5.28	5	4.72	5.06	6.11	6.04	6.62	7.87	6.4	3.39	3.43	4.55	4.7	5.25	6.62	7.33	7.15	7.37	5.9	6.33	5.56	4.12	3.4	5.6	5.24	5.26	5.45	5.11	5.79	5.75	6.43	5.49	3.27	6.47	3.53	6.8	5.66	4.83	4.3	5.03	4.49	6.02	5.43	4.19
Yashixiang	Guangdong	Oolong tea	5.97	5.88	5.43	6.16	4.86	5.42	5.49	5.68	5.81	6.32	7.9	6.02	3.7	3.64	4.42	5.42	5.85	6.33	7.4	6.83	7.41	6.58	5.77	5.29	5.32	5.63	5.08	5.26	6.2	5.9	5.32	5.48	6.21	6.14	5.43	4.46	6.36	3.4	6.49	5.46	3.39	4.6	5.08	4.16	5.98	5.24	4.01
Dahongpao	Fujian	Oolong tea	5.33	5.44	4.76	5.68	4.52	4.78	5.85	5.66	4.84	6.07	7.76	5.91	3.39	3.38	3.98	4.78	5.34	6.04	7.15	6.62	7.21	6.61	6.36	5.22	4.59	4.16	4.8	4.77	5.2	6.62	5.45	5.77	5.92	6.22	4.62	3.63	6.17	3.41	6.42	5.39	4.1	3.9	5.04	4.09	5.8	5.19	4.02
Milanxiang	Guangdong	Oolong tea	6.16	5.91	4.39	5.98	4.45	4.53	5.31	4.58	5.66	5.92	7.86	5.79	3.39	3.88	4.51	5.34	5.37	5.94	7.25	6.64	7.38	6.76	6.04	5.43	5.42	5.83	5.28	4.78	6.06	5.72	5.44	4	6.15	4.74	4.81	4.26	6.29	3.37	6.52	5.05	3.4	4.82	5.23	3.86	5.66	5.01	4.08
Yongchunfoshou	Fujian	Oolong tea	5.75	5.31	4.89	5.5	4.83	5	4.86	5.95	5.71	6.37	7.69	6.16	3.38	3.59	4.41	5.02	5.03	6.37	7.21	6.97	7.3	5.75	5.88	5.47	4.41	3.34	5.35	5.28	5.23	4.92	4.78	4.85	5.27	5.75	4.98	3.31	6.55	3.4	6.83	5.85	3.7	4.38	4.82	4.24	5.74	5.17	3.39
Dongfangmeiren	Taiwan	Oolong tea	4.97	3.41	3.25	4.46	4.99	3.83	5.86	5.86	5.2	4.51	7.87	4.57	3.4	3.46	3.22	4.28	4.58	4.49	6.21	4.69	5.99	6.69	3.58	4.93	3.99	3.41	3.36	3.69	5.05	6.48	5.79	4.83	6.46	6.29	4.8	3.21	5.29	3.39	5.26	4.01	3.41	3.61	3.54	3.39	4.47	3.61	4.13
Shuixiancha	Fujian	Oolong tea	5.83	5.31	4.81	5.63	4.75	4.75	5.8	5.59	4.93	6.1	7.79	5.88	3.39	3.38	4.26	4.61	5.06	6.11	7.13	6.61	7.16	6.52	6.01	5.2	4.39	4.45	5.08	4.69	4.84	6.11	4.7	5.45	5.71	6.25	4.76	3.89	5.98	3.56	6.51	5.03	4.56	4.47	4.93	3.98	5.68	4.96	4.03
Rougui	Fujian	Oolong tea	5.45	5.04	4.6	5.15	4.83	4.58	6.02	6.12	5.3	6.07	7.71	5.86	3.46	3.39	3.35	4.69	5.55	6.09	6.98	6.67	7.07	6.49	5.94	5.36	4.34	4.67	4.48	4.65	5.24	6.22	4.93	5.19	5.61	6.21	4.67	4.12	6	3.51	6.19	5.33	4.1	4.08	4.79	4.07	5.79	5.11	3.71
Yancha	Fujian	Oolong tea	5.46	4.82	4.58	5.13	3.84	4.49	5.43	5.47	4.59	6.02	7.66	5.72	3.46	3.66	4.39	4.42	4.88	6.04	7.04	6.49	7.03	6.51	6.14	5.23	4.44	4.45	5.02	4.42	5.17	6.15	4.79	5.33	5.44	5.73	4.45	3.29	6.04	3.85	6.3	5.17	3.6	4.16	4.98	3.87	5.67	5	3.96
Baimudan	Fujian	white tea	6.49	4.39	5.74	4.46	5.42	5.73	6.09	6.09	6.27	6.18	8.21	6.09	3.8	4.4	4.71	6.14	6.06	6.21	7.69	6.68	7.61	7.03	5.45	5.25	5.35	5.73	5.24	5.3	5.46	6.37	6.02	6.47	6.73	6.87	6.05	5.51	6.54	4.11	6.69	5.62	5.06	5.36	5.31	4.74	6.42	5.64	4.67
Gongmei	Fujian	white tea	5.85	3.4	4.86	3.46	5.34	4.99	5.87	6.17	5.55	5.61	8.19	6.09	3.78	4.11	4.19	4.83	5.11	5.61	7.27	5.89	6.99	7	4.67	6.07	4.69	4.65	4.52	4.38	5.79	6.58	5.36	6.27	6.35	6.88	5.62	4.22	6.46	3.66	6.9	5.47	5.02	4.69	4.41	4.15	5.43	4.79	4.73
Shoumei	Fujian	white tea	6.03	3.42	5.12	3.39	5.02	5.11	6.07	6.22	5.64	5.51	8.15	5.95	3.39	4.06	4.17	5.2	5.26	5.47	7.25	5.92	7.09	7.14	4.62	6.07	4.58	4.78	4.71	4.5	5.87	6.56	5.44	6.26	6.33	6.82	5.61	4.32	6.38	3.84	6.76	5.42	4.95	4.82	4.51	4.02	5.63	4.88	4.7
Laobaicha	Fujian	white tea	6.46	3.47	6.01	3.4	5.62	6	6.11	6.12	6.07	6.42	8.15	6.22	3.79	4.26	4.56	5.96	5.98	6.42	7.66	7.05	7.64	6.86	5.56	5.35	5.37	5.65	5.24	5.55	5.68	6.17	6.03	6.57	6.67	6.96	6.05	5.42	6.46	4.23	6.58	5.62	5.16	5.32	5.17	4.71	6.36	5.67	4.53
Sangzhibaicha	Hunan	white tea	5.61	3.77	4.38	4.24	4.43	4.35	5.37	6.11	5.28	5.16	7.79	5.3	3.4	3.57	3.87	4.78	4.69	5.15	6.88	5.46	6.64	6.59	4.43	4.89	4.16	3.99	4.48	3.98	5.15	6.58	5.06	5.61	6.34	6.13	4.76	4.18	5.78	3.36	6.13	4.79	3.7	4.18	3.79	3.47	4.94	4.31	4.25
Huoshanhuangya	Anhui	yellow tea	6.35	5.27	3.59	5.29	5.18	5.08	4.48	5.93	6.68	5.51	7.6	6.07	3.78	3.85	4.55	6.16	5.97	6.18	7.45	6.79	7.5	6.48	6.02	5.05	4.33	4.33	5.29	4.71	5.21	5.8	5.74	6.67	6.47	6.77	5.86	4.99	6.34	4.39	6.49	5.34	5.1	4.82	5.19	4.37	6.01	5.3	4.09
Guangdongdayeqing	Guangdong	yellow tea	6.31	2.92	5.58	3.97	5.52	6.09	4.72	6.05	5.96	6.49	7.57	6.13	3.5	4.59	4.73	6.1	5.97	6.93	7.68	6.86	7.33	6.65	6.37	4.84	4.51	4.35	5.14	5.2	4.96	5.43	5.56	4.21	6.55	4.89	5.61	5.01	5.94	2.61	6.3	5.1	2.75	4.81	5.89	4.57	6.48	5.52	4.93
Weishanmaojian	Hunan	yellow tea	6.37	4.3	5.17	4.32	5.49	5.65	4.78	5.89	6.14	5.86	7.6	6.13	3.55	4.04	4.58	6.54	5.93	6.48	7.5	6.98	7.45	6.35	6.17	4.29	4.59	4.55	5.22	5.05	5.29	6.02	5.57	6.07	6.54	6.53	5.67	5.18	6.14	3.75	6.4	5.31	4.52	4.85	5.38	4.56	6.19	5.5	4.4
Mengdinghuangya	Sichuan	yellow tea	6.39	5.29	3.61	5.33	5.38	5.16	4.58	5.94	6.76	5.68	7.64	6.08	3.77	3.94	4.62	6.09	5.98	6.25	7.44	6.79	7.44	6.46	6.07	4.72	4.4	4.31	5.44	4.77	5.15	5.67	5.73	6.63	6.44	6.75	5.87	5.06	6.37	4.66	6.49	5.38	5.12	4.86	5.46	4.56	6.23	5.48	4.06
Pingyanghuangtang	Zhejiang	yellow tea	5	4.17	3.43	4.32	4.4	4.24	3.43	6.18	4.64	4.79	7.42	6.01	2.8	3.37	3.82	4.36	4.63	5.75	6.89	6.4	7.05	6.54	5.71	5.51	4.31	4.93	4.61	4.57	5.65	6.19	4.58	5.59	5.21	6.1	5.06	2.86	5.84	2.61	6.28	5.13	4.39	3.25	4.49	3.98	5.41	4.99	3.63
Moganhuangya	Zhejiang	yellow tea	5.99	1.6	4.43	2.73	5.46	4.6	4.37	4.82	6	4.24	7.67	4.18	3.56	3.52	2.43	5.9	5.59	4.86	6.58	4.38	5.65	6.86	3.52	4.07	3.75	3.42	2.85	3.06	3.6	6.02	5.37	5.03	6.44	5.74	5.49	4.47	4.36	1.93	4.52	3.65	2.5	4.36	3.94	3.15	4.59	3.85	4.37
[truncated: 8 more columns]
